# Supplementary material
Source: HighWire-hosted journal article supplement (https://bmjopen.bmj.com/content/8/12/e023824)

**Supplementary Material**

**Figure A:**  
mCRBSI incidence rate per 1000 patient-days: Overall and subgroups

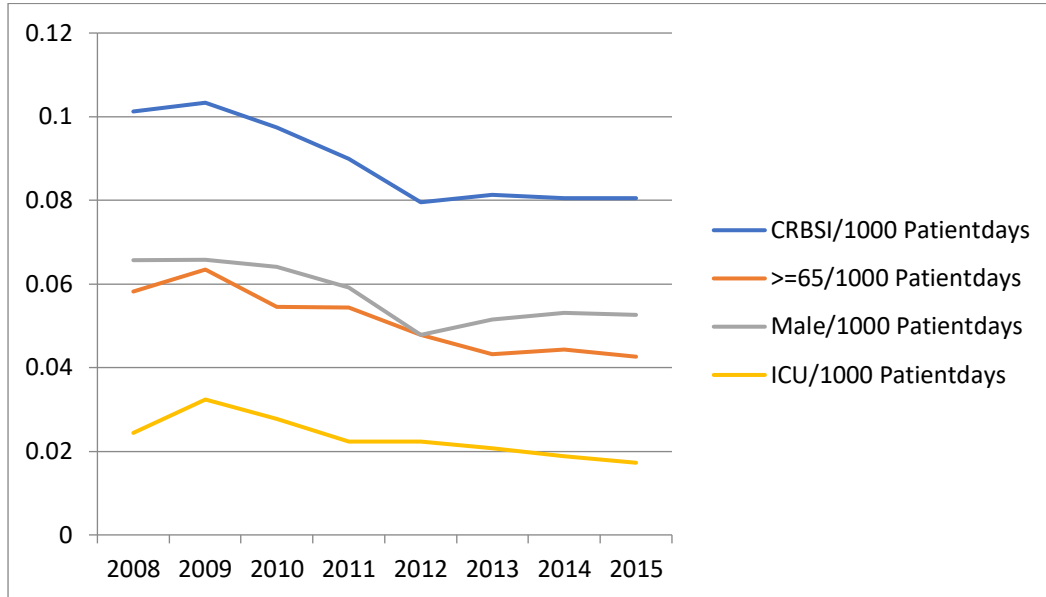

**Figure B:**  
mCRBSI incidence rate per 1000 patient-days by causative organism

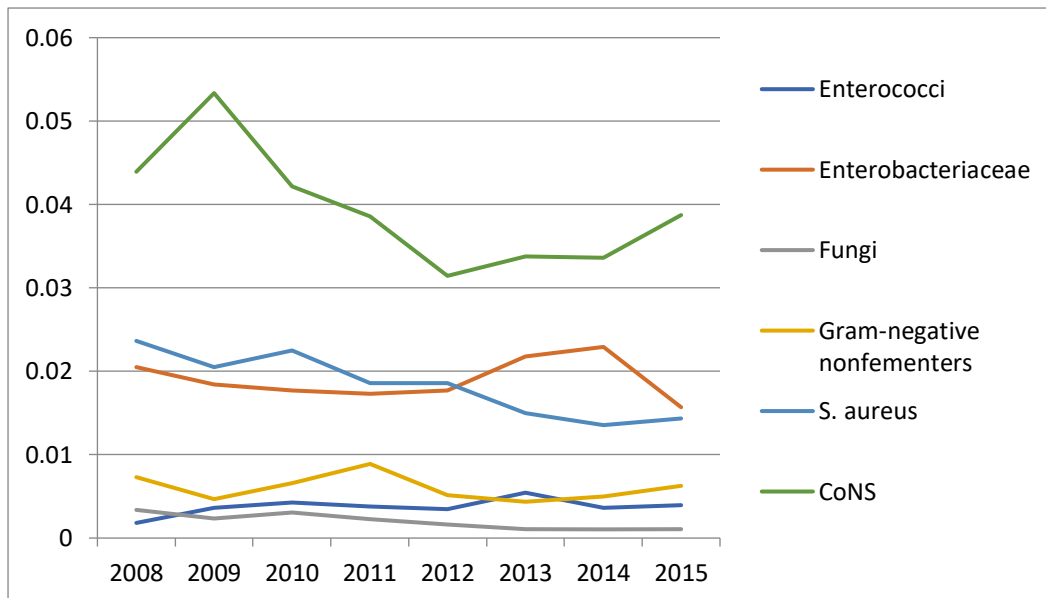

Figure C  
Overall mCRBSI incidence rate per 1000 admissions

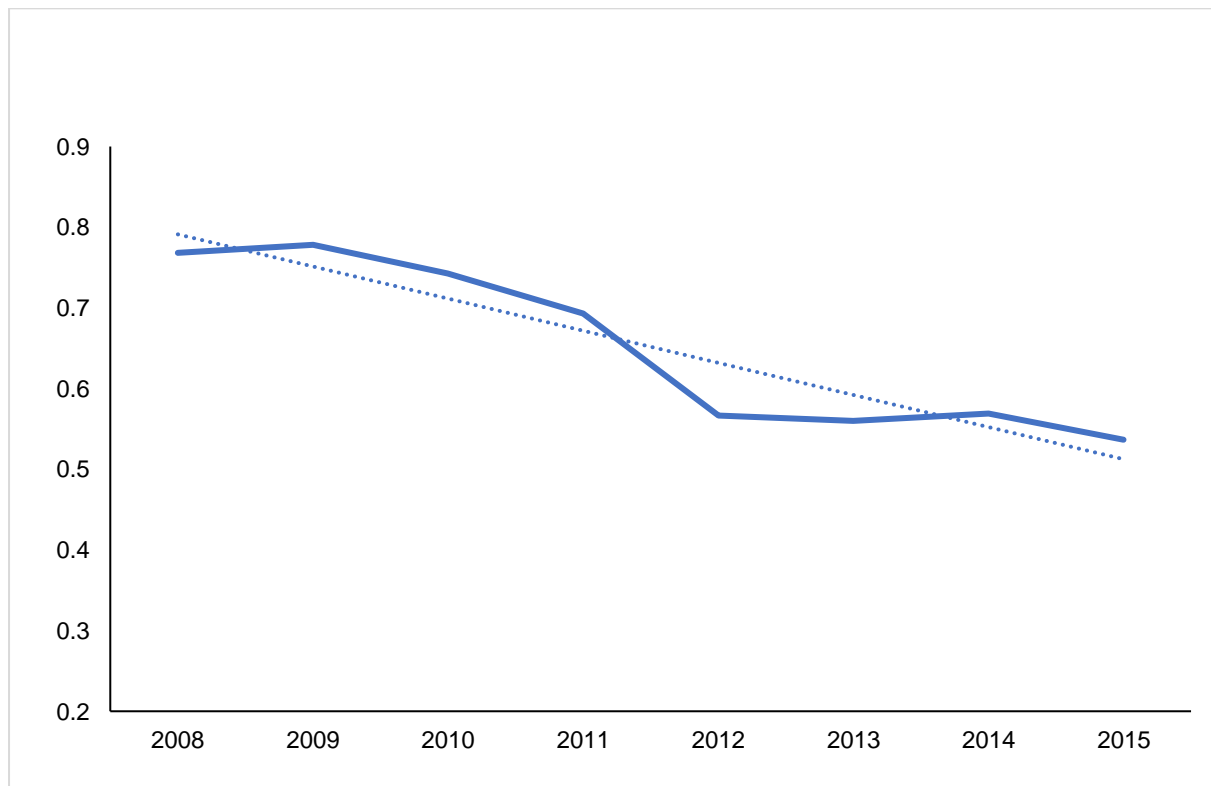

Footnote: \*mCRBSI was defined as isolating the same microorganism with identical antibiogram from  $\geq 1$  blood cultures (performed -7 days to +2 days around the catheter removal) as the one recovered from the catheter tip.

**Figure D (1-3)**

**Figure D1**

Evolution of ceftriaxone resistance in Enterobacteriaceae

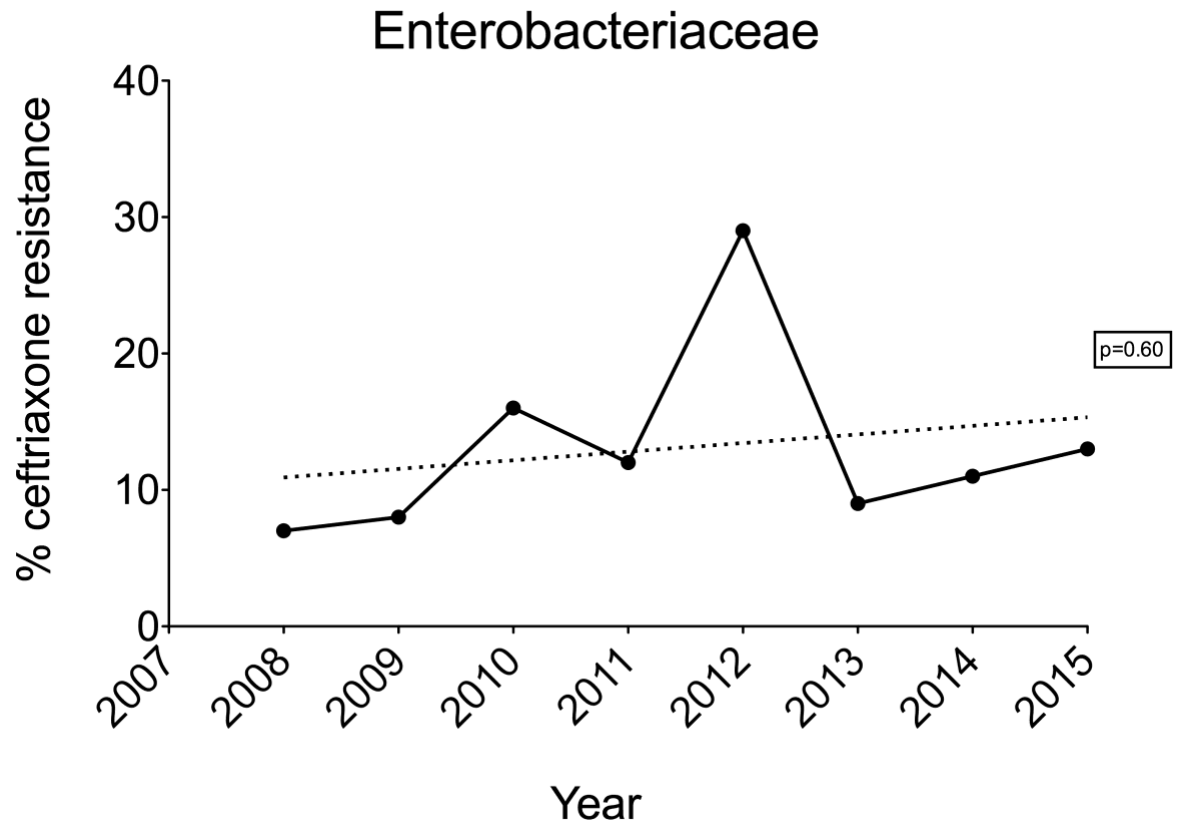

Figure D2  
Evolution of vancomycin resistance in Enterococci

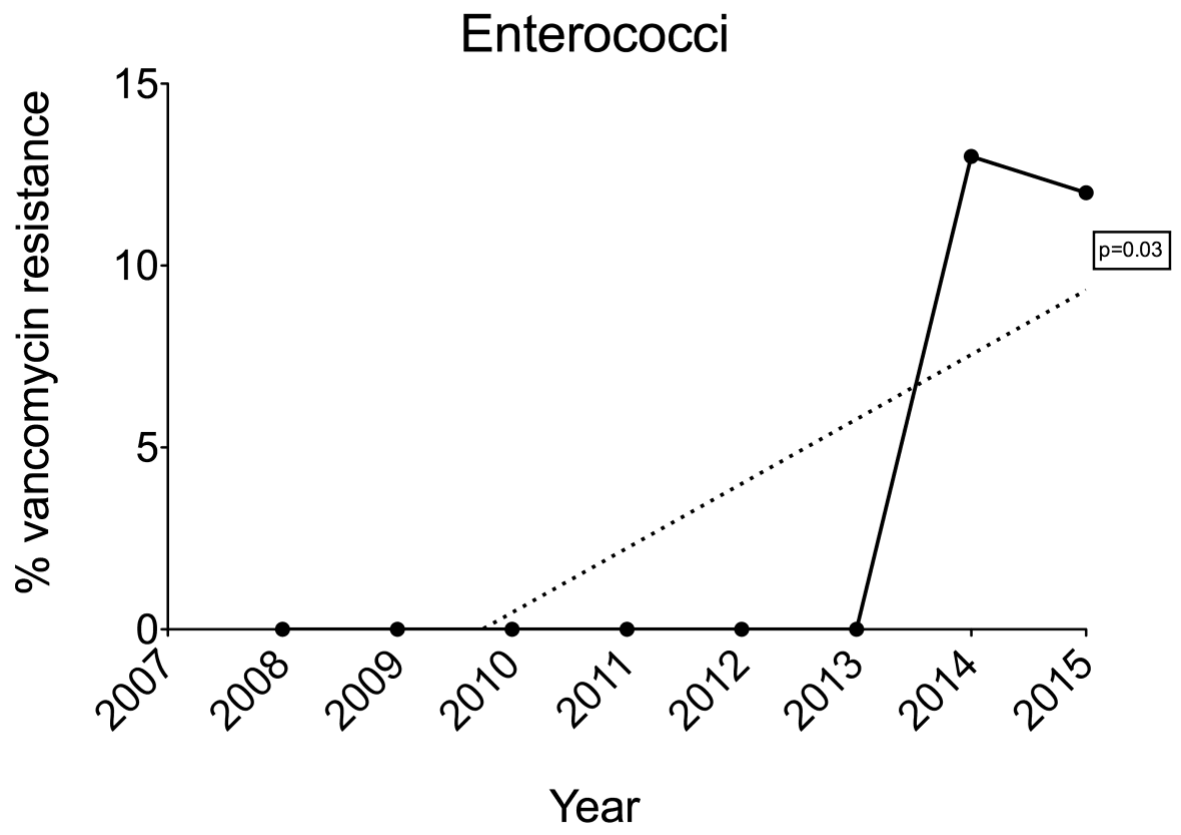

Figure D3  
Evolution of cefepime resistance in Gram negative non-fermenters

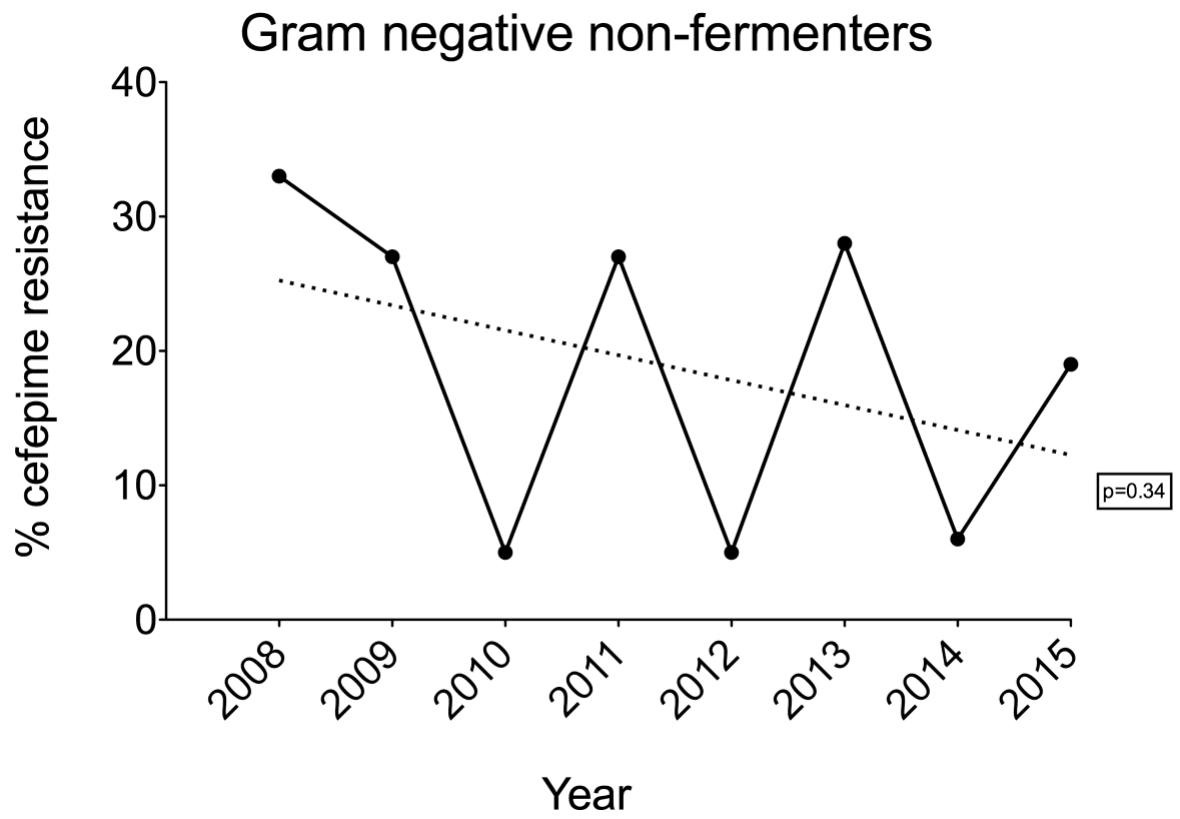

Supplement: inline-supplementary-material-1 [file inline-supplementary-material-1.pdf]
